# Supplementary material for: Isomorphic titanium-substituted mesoporous SBA-16 as support for cobalt Fischer–Tropsch synthesis catalysts: balance between dispersion and reduction
Source: Royal Society of Chemistry journal article supplement (doi:10.1039/d0nj04654j), 2021-01-01
Supplement: d0nj04654j1.pdf [file d0nj04654j1.pdf]

## Isomorphous titanium-substituted mesoporous SBA-16 as support for cobalt Fischer–Tropsch synthesis catalysts: Balance between dispersion and reduction

Liang Wei<sup>ab ‡</sup>, Jian Chen<sup>c ‡</sup>, Shuai Lyu<sup>a</sup>, Chengchao Liu<sup>a</sup>, Yanxi Zhao<sup>a</sup>, Yuhua Zhang<sup>a</sup>, Jing Yang<sup>b</sup>, Jinlin Li<sup>\*a</sup>

a. Key Laboratory of Catalysis and Materials Science of the State Ethnic Affairs Commission & Ministry of Education, South-Central University for Nationalities, Wuhan 430074, Hubei Province, P.R. China. E-mail: jinlinli@aliyun.com.

b. Guangxi Key Laboratory of Natural Polymer Chemistry and Physics, Nanning Normal University, Nanning 530001, P. R. China.

c. Hubei Key Laboratory for Processing and Application of Catalytic Materials, Huanggang Normal University, Huanggang 438000, P.R. China.

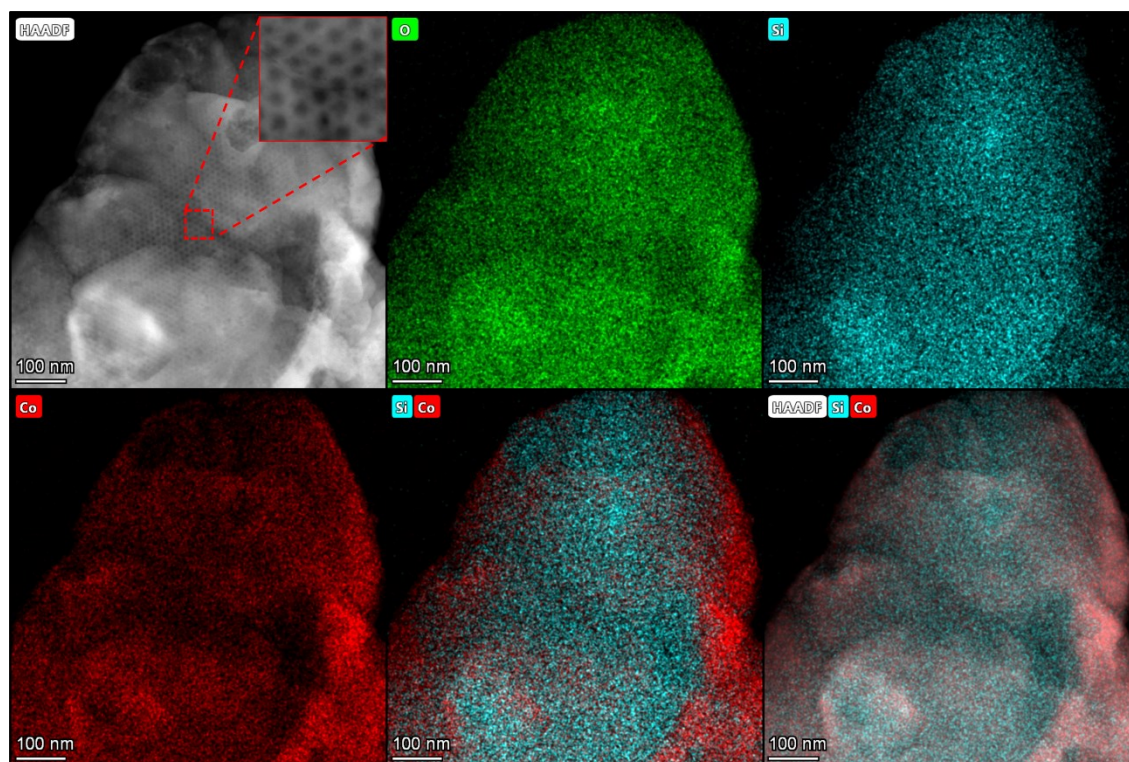

Figure S1 HAADF-STEM image and corresponding EDS element maps of Co/SBA-16.

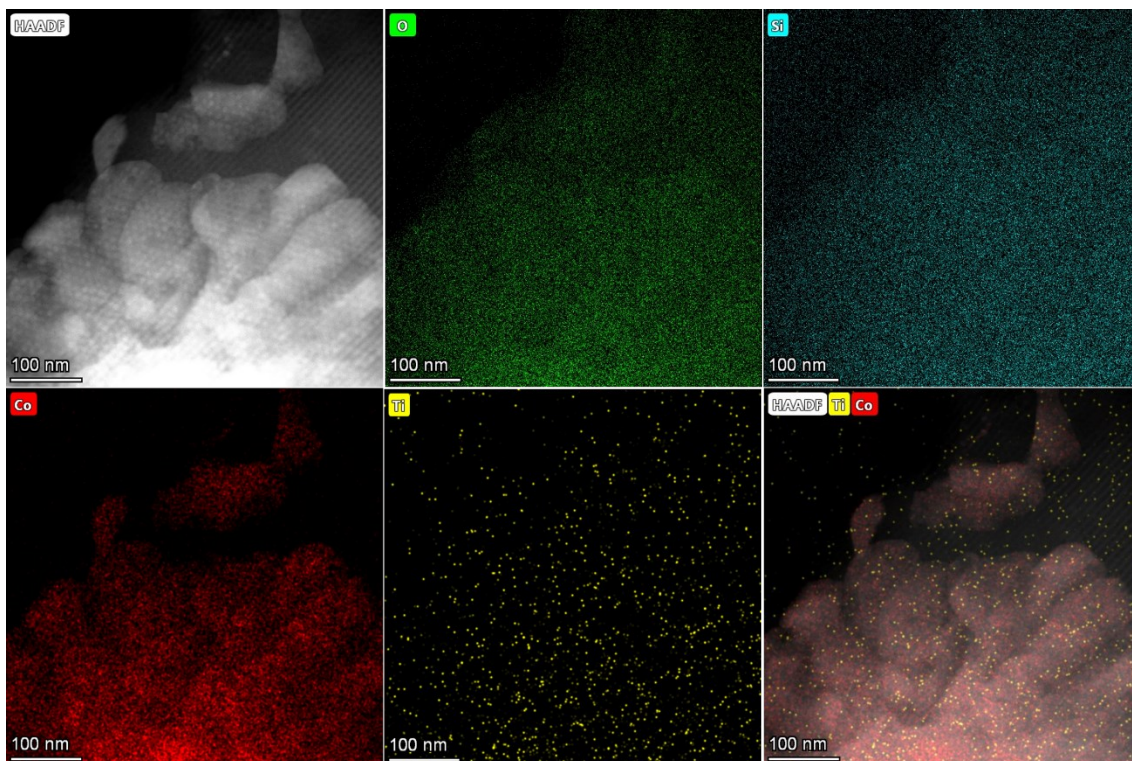

Figure S2 HAADF-STEM image and corresponding EDS element maps of Co/Ti(22)-SBA-16.

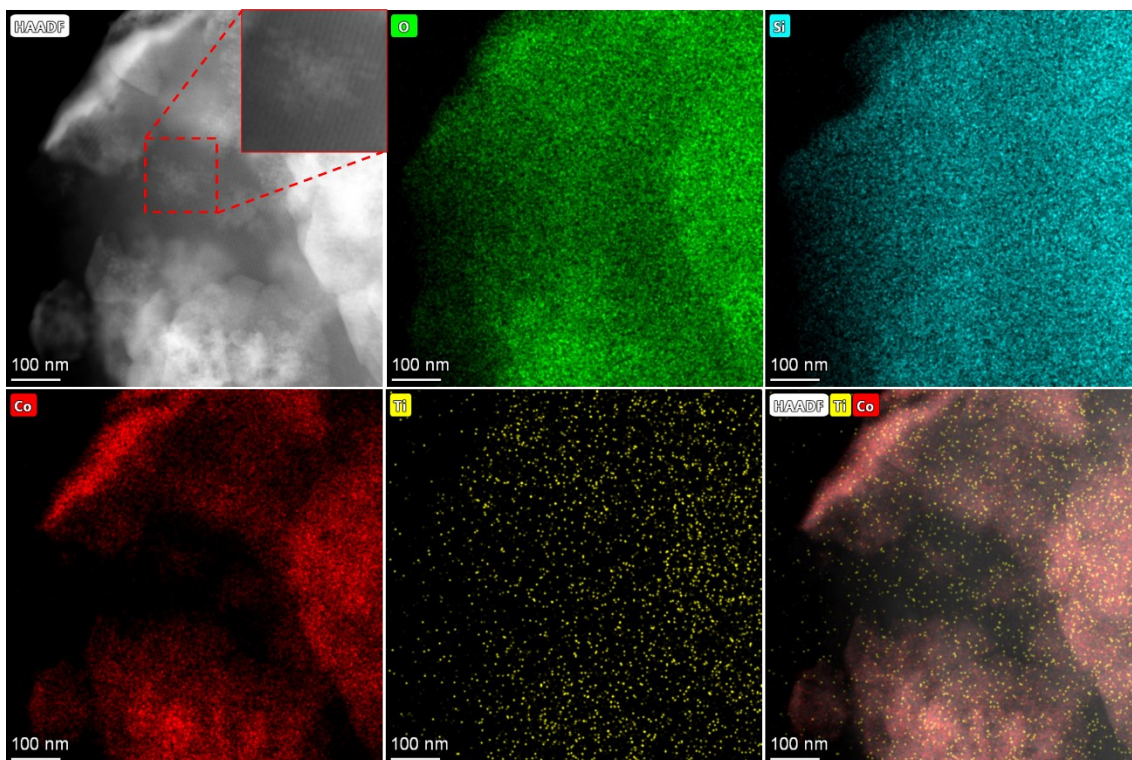

Figure S3 HAADF-STEM image and corresponding EDS element maps of Co/Ti(11)-SBA-16.

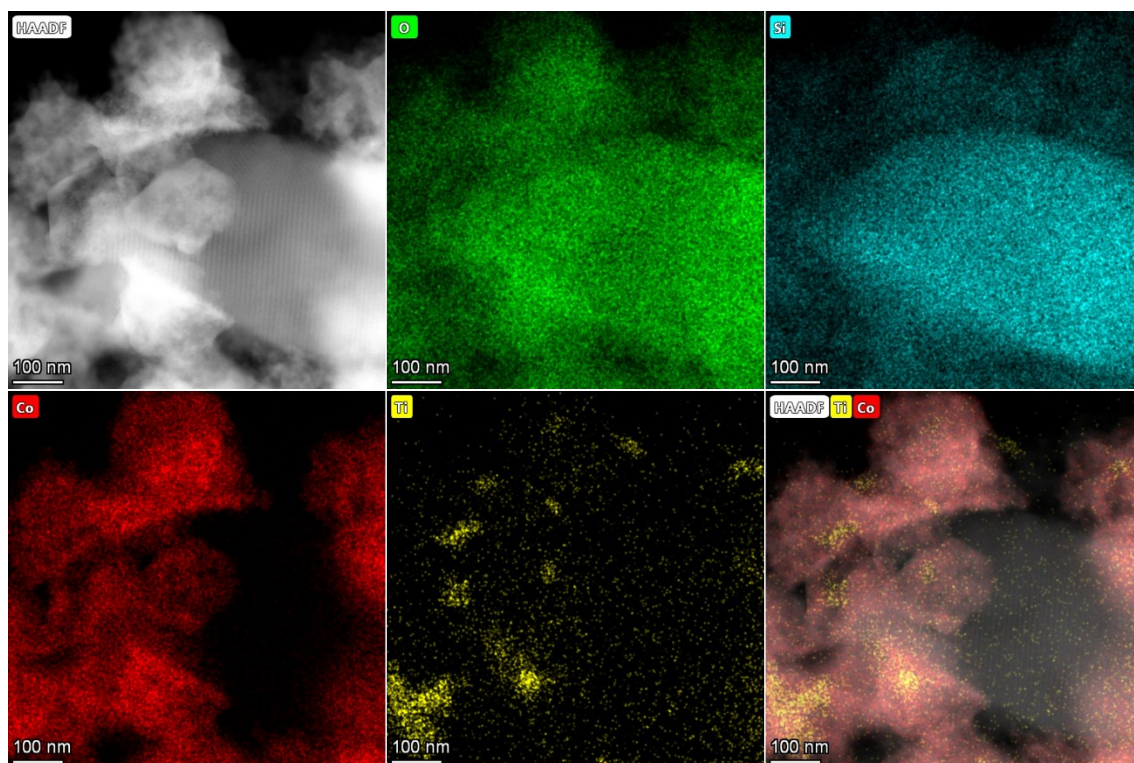

Figure S4 HAADF-STEM image and corresponding EDS element maps of Co/Ti(5.5)-SBA-16.

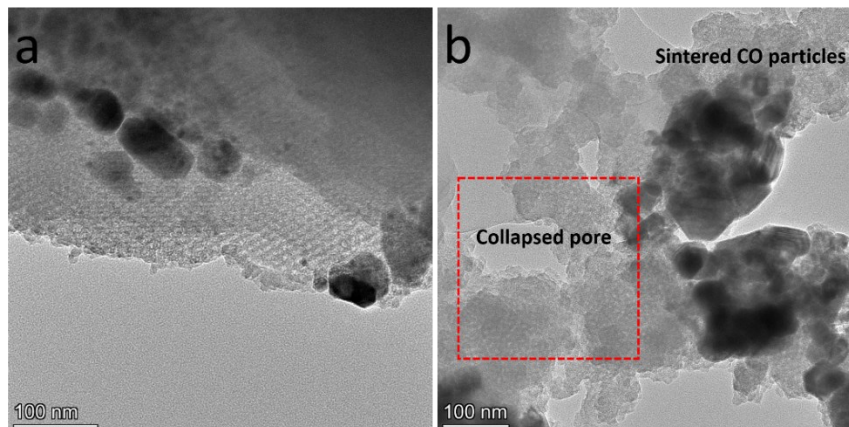

Figure S5 STEM of used Co/Ti(11)-SBA-16 catalyst.

Table S1 Detail data from  $\text{NH}_3$ -TPD.

| Sample            | Total acid content<br>(mmol/g) |
|-------------------|--------------------------------|
| Co/SBA-16         | 0.86                           |
| Co/Ti(22)-SBA-16  | 1.73                           |
| Co/Ti(11)-SBA-16  | 2.67                           |
| Co/Ti(5.5)-SBA-16 | 3.34                           |
